# Supplementary material for: Myokine Responses to Exercise in a Rat Model of Low/High Adaptive Potential
Source: PubMed Central journal article supplement (PMC8220071; doi:10.3389/fendo.2021.645881), 2021-06-09
Supplement: Table_1.pdf [file Table_1.pdf]

**Table 1.** Myokine sensitivity multiplex ELISA. Minimum detection level (Min DC) of 3 assays.

| <b>Analyte</b>         | <b>Min DC (3 assays)</b> | <b>Standard range</b> |
|------------------------|--------------------------|-----------------------|
| BDNF (pg/mL)           | 3.56                     | 7-30,000              |
| Erythropoietin (pg/mL) | 3.99                     | 24-100,000            |
| IL-15 (ng/mL)          | 0.14                     | 0.5-2000              |
| FGF21 (pg/mL)          | 7.01                     | 5-20,000              |
| Fractalkine (pg/mL)    | 1.60                     | 5-20,000              |
| IL-6 (ng/mL)           | 0.17                     | 0.2-1000              |
| FSTL-1 (pg/mL)         | 29.29                    | 98-400,000            |
| GDF8/Myostatin (ng/mL) | 0.32                     | 1-4000                |
| Irisin (ng/mL)         | 0.28                     | 0.5-2000              |
| LIF (pg/mL)            | 13.36                    | 49-200.000            |
| Osteocrin (pg/mL)      | 5.66                     | 10-40,000             |
| SPARC (ng/mL)          | 0.13                     | 0.2-1000              |
